# Supplementary material for: Synthesis and Characterization of Amphiphilic Diblock Polyphosphoesters Containing Lactic Acid Units for Potential Drug Delivery Applications
Source: MDPI journal article supplement (doi:10.3390/molecules28135243), 2023-07-06
Supplement: s1 [file s1]

# Synthesis and Characterization of Amphiphilic Diblock Polyphosphoesters Containing Lactic Acid Units for Potential Drug Delivery Applications

Tatsuya Sakuma<sup>1</sup>, Kimiko Makino<sup>1</sup>, Hiroshi Terada<sup>1</sup>, Issei Takeuchi<sup>1,2\*</sup>, Violeta Mitova<sup>3</sup>, Kolio Troev<sup>1,3\*</sup>

<sup>1</sup>Faculty of Pharmaceutical Sciences, Tokyo University of Science, 2641, Yamazaki, Noda, Chiba 278-8510, Japan

<sup>2</sup>Faculty of Pharmaceutical Science, Josai International University, 1 Gumyo, Togane, Chiba 283-8555, Japan

<sup>3</sup>Institute of Polymers, Bulgarian Academy of Sciences, Sofia 113, Bulgaria

## Supplementary Data:

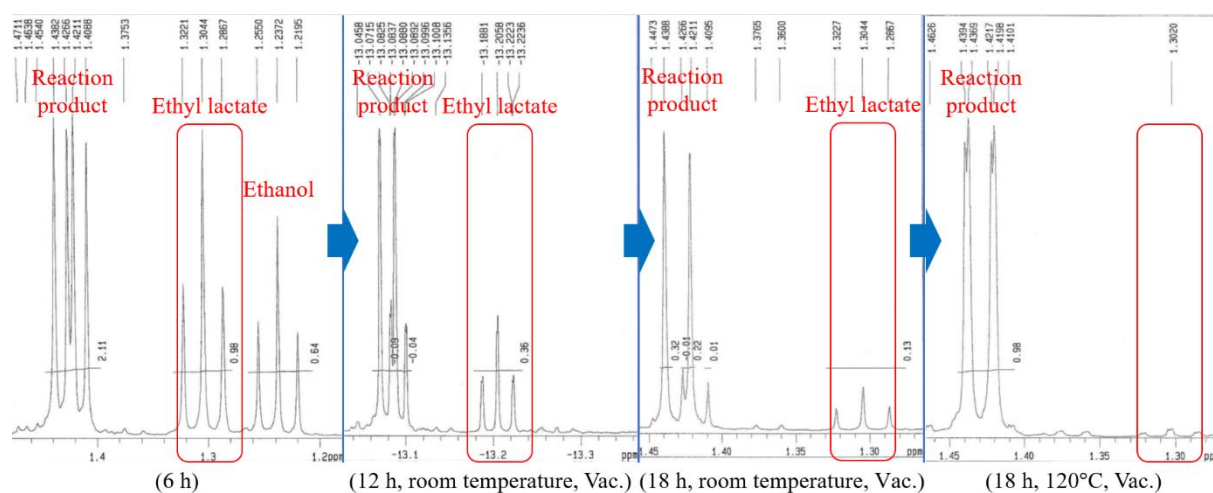

**Figure S1.** Reaction progress based on <sup>1</sup>H NMR spectroscopy.

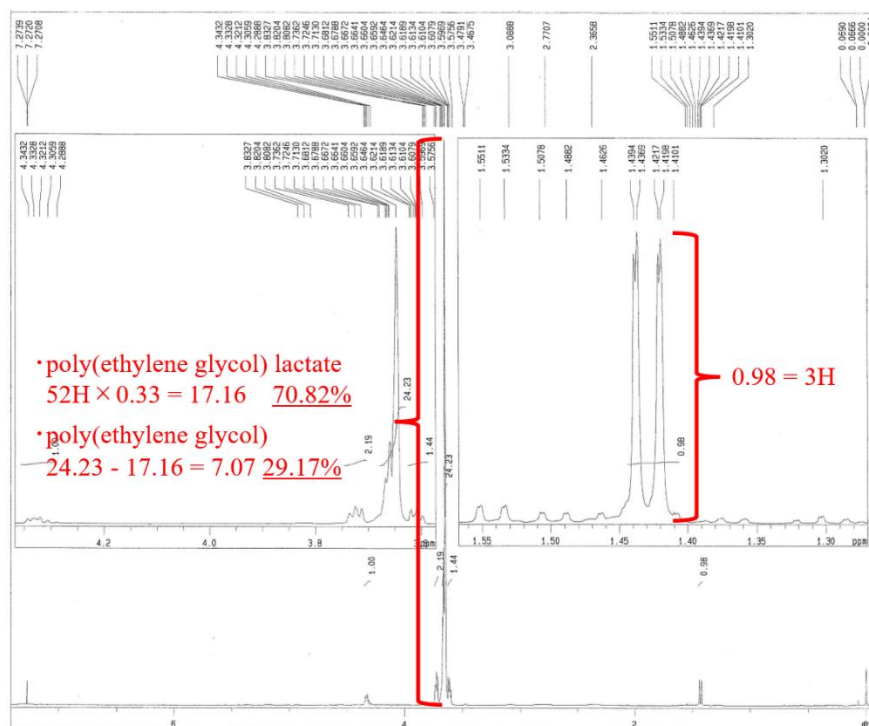

**Figure S2.** Calculation of the content of the products in the reaction mixture based on the integral intensity.

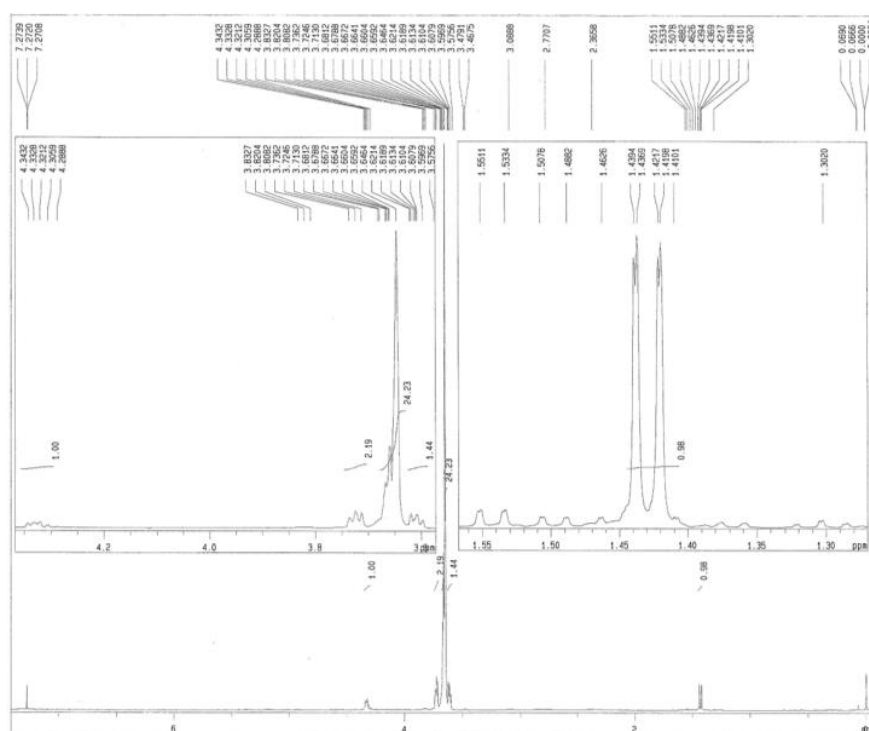

**Figure S3.**  $^1\text{H}$  NMR spectrum of the reaction product obtained from poly(ethylene glycol) 600 and ethyl lactate.



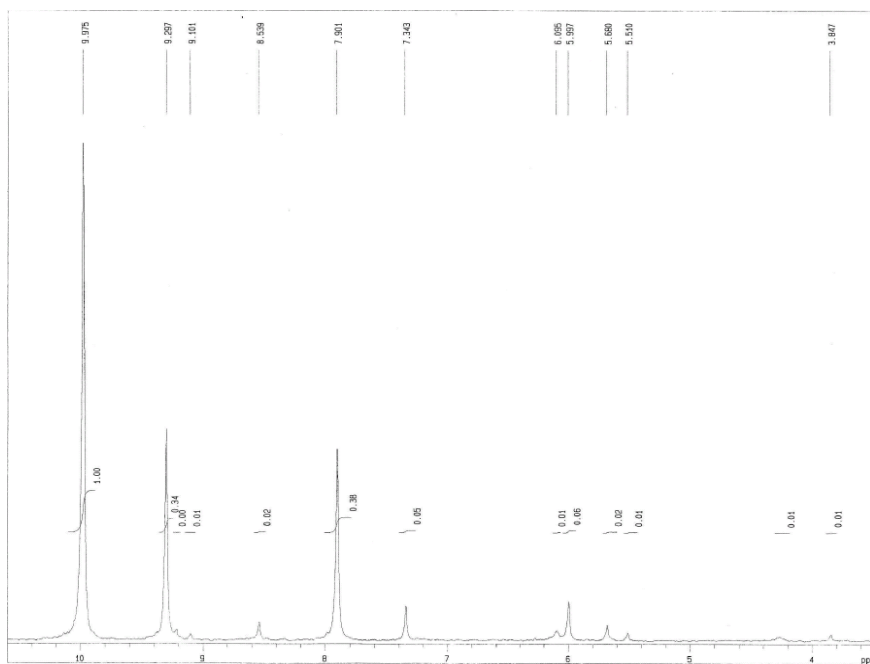

**Figure S6.**  $^{31}\text{P}\{\text{H}\}$  NMR spectrum of poly[poly(ethylene glycol H-phosphonate) *co* poly[poly(ethylene glycol)lactate H-phosphonate].

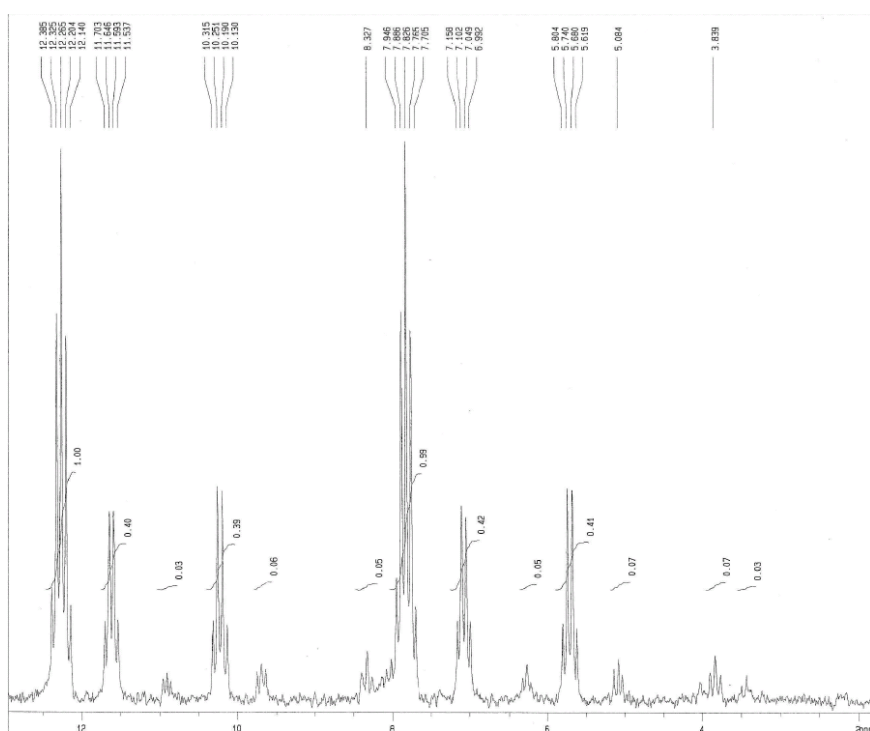

**Figure S7.**  $^{31}\text{P}$  NMR spectrum of poly[poly(ethylene glycol H-phosphonate) *co* poly[poly(ethylene glycol)lactate H-phosphonate].

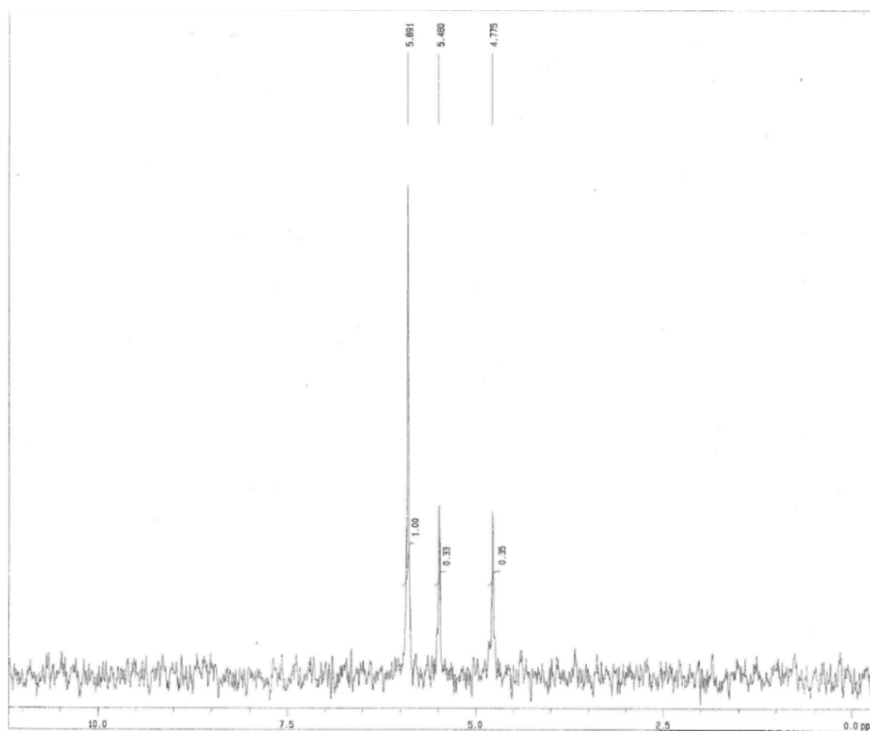

**Figure S8.**  $^{31}\text{P}\{\text{H}\}$  NMR of poly[poly(ethylene glycol) chlorophosphate]*co* poly[poly(ethyleneglycol)lactate chlorophosphate].

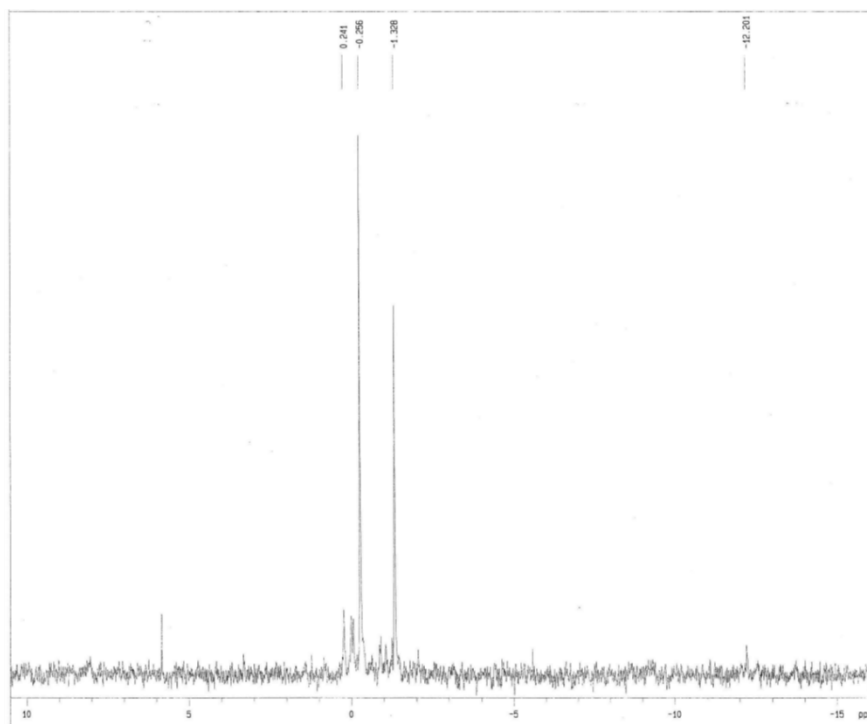

**Figure S9.**  $^{31}\text{P}\{\text{H}\}$  NMR of poly[polyalkyl(ethylene glycol) phosphate]*co* poly[polyalkyl(ethyleneglycol)lactate phosphate].
